# Supplementary material for: A Nature-Inspired Nrf2 Activator Protects Retinal Explants from Oxidative Stress and Neurodegeneration
Source: MDPI journal article supplement (doi:10.3390/antiox10081296), 2021-08-16
Supplement: s1 [file s1]

## Supplementary figures

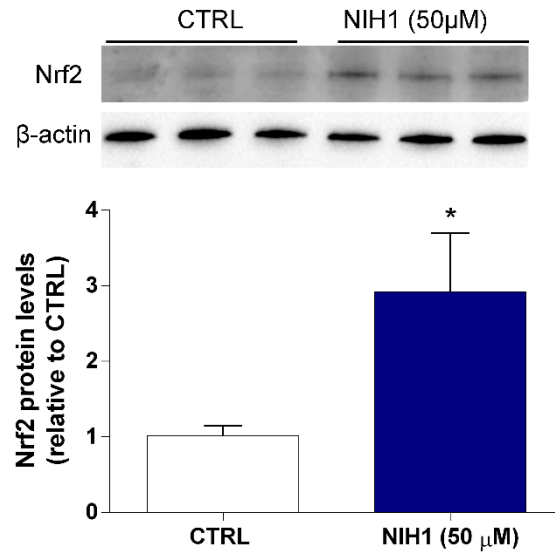

**Figure S1.** Western blot analysis of cytosolic protein fraction showing representative immunoreactive bands and quantitative densitometric analysis of the Nrf2 protein levels in CTRL explants and in explants treated with 50  $\mu$ M NIH1 for 24 h. Mean  $\pm$  SEM, unpaired t-test,  $n=3$ . \* $p<0.05$  vs CTRL.

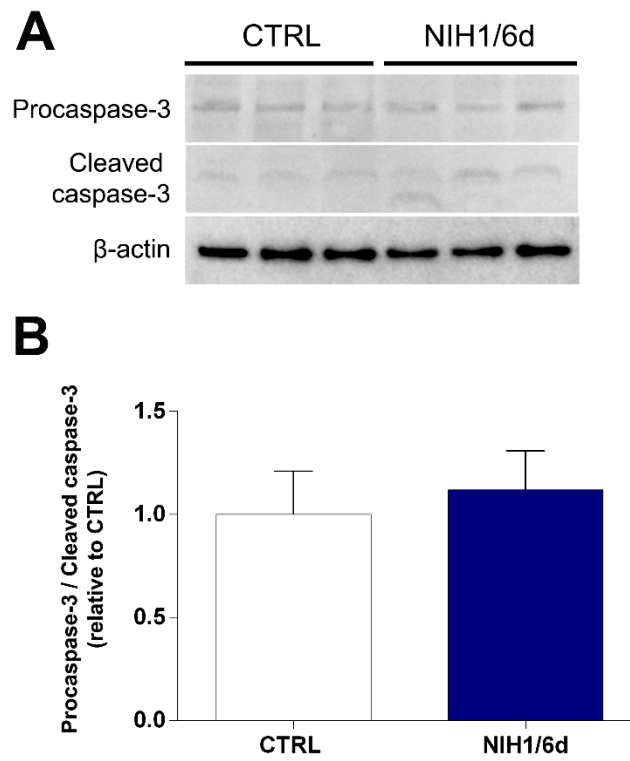

**Figure S2.** Effect of NIH1 on cleaved caspase-3/procaspase-3 ratio. Western blot of total protein fraction obtained with antibody Cell Signaling #9661, which recognizes both procaspase-3 and cleaved caspase-3, showing representative immunoreactive bands of cleaved caspase-3 and procaspase-3 (A) together with their ratio (B) calculated from the quantitative densitometric analysis of the respective immunoreactive bands, in CTRL explants and in retinal explants treated with 50  $\mu$ M NIH1 for six days. Unpaired t-test, n=3.

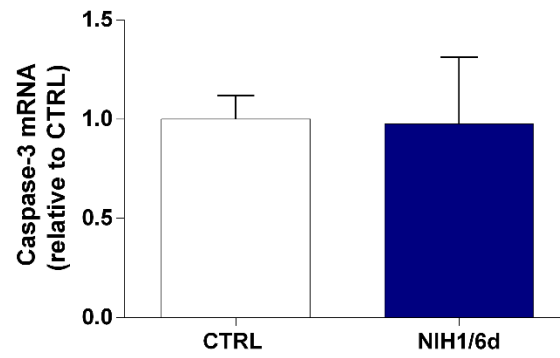

**Figure S3.** Effect of NIH1 on caspase-3 mRNA expression. qPCR analysis showing the relative levels of caspase-3 mRNA in retinal explants treated with 50  $\mu$ M NIH1 for six days (NIH1/6d). CTRL, control, untreated explants. Mean  $\pm$  SEM, unpaired t-test, n=3.

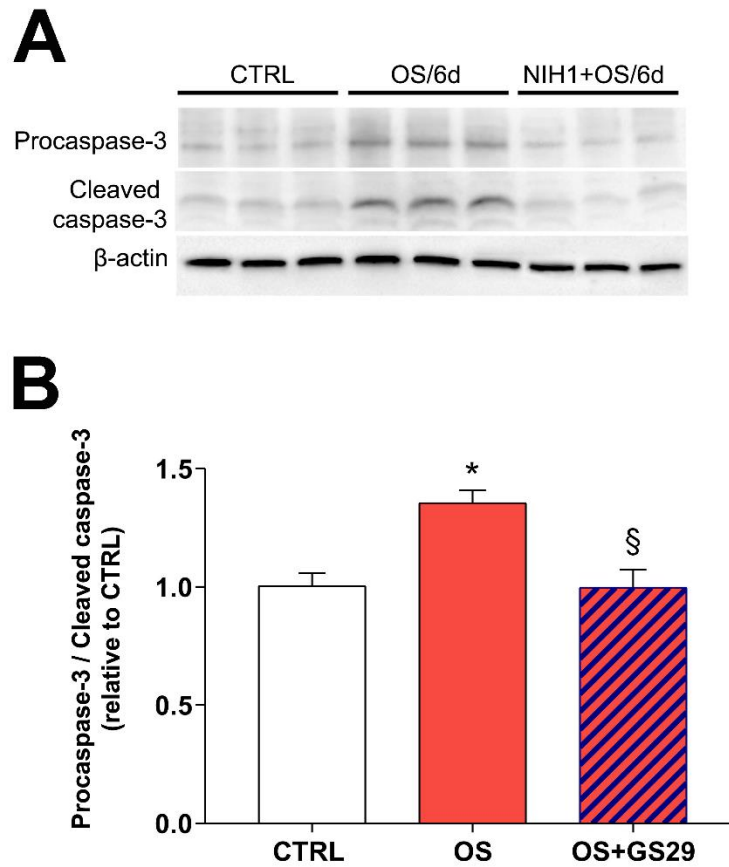

**Figure S4.** Effect of NIH1 on cleaved caspase-3/procaspase-3 ratio. Western blot of total protein fraction obtained with antibody Cell Signaling #9661, which recognizes both procaspase-3 and cleaved caspase-3, showing representative immunoreactive bands of cleaved caspase-3 and caspase-3 (A) together with their ratio (B) calculated from the quantitative densitometric analysis of the respective immunoreactive bands, in CTRL, OS/6d and NIH1+OS/6d explants. One-way ANOVA, n=3; \*p < 0.05 vs CTRL; §p < 0.05 vs OS/6d.

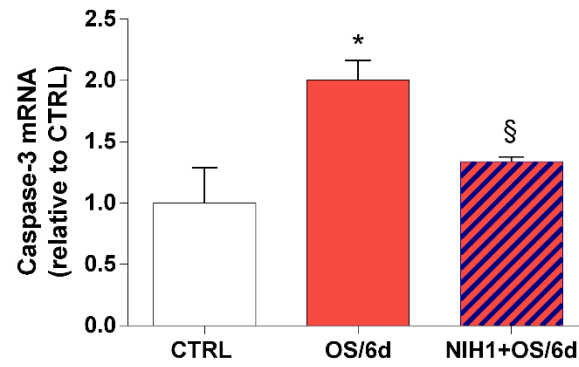

**Figure S5.** Effect of NIH1 on caspase-3 mRNA expression. qPCR analysis showing the relative levels of caspase-3 mRNA in control retinal explants (CTRL), in retinal explants incubated with 100  $\mu$ M H<sub>2</sub>O<sub>2</sub> for six days (OS/6d), and in retinal explants incubated with 100  $\mu$ M H<sub>2</sub>O<sub>2</sub> together with 50  $\mu$ M NIH1 for six days (NIH1+OS/6d). Mean  $\pm$  SEM, one-way ANOVA, n=3; \*p < 0.05 vs CTRL; §p < 0.05 vs OS/6d.
